# Supplementary material for: Perylene bisimide with diphenylacrylonitrile on side-chain: strongly fluorescent liquid crystal with large pseudo Stokes shift based on AIE and FRET effect
Source: Royal Society of Chemistry journal article supplement (doi:10.1039/c8sm01183d), 2018-01-01
Supplement: c8sm01183d1.pdf [file c8sm01183d1.pdf]

## Supporting Information for

# Perylene bisimide with diphenylacrylonitrile on side-chain: Strong fluorescence liquid crystal with large pseudo Stokes shift based on AIE and FRET effect

Mingguang Zhu,<sup>a</sup> Yunxiang Chen,<sup>a</sup> Xiaoyi Zhang,<sup>a</sup> Meihui Chen,<sup>a</sup> Hongyu Guo,<sup>\*a,b</sup> and Fafu Yang,<sup>\*a,c</sup>

<sup>a</sup> College of Chemistry and Chemical Engineering, Fujian Normal University, Fuzhou 350007, P.R.China; E-mail: yangfafu@fjnu.edu.cn

<sup>b</sup>Fujian Key Laboratory of Polymer Materials, Fuzhou 350007, P.R. China

<sup>c</sup>Fujian provincial Key Laboratory of Advanced Materials Oriented Chemical Engineering, Fuzhou 350007, China

## 1. The synthetic route of title compound

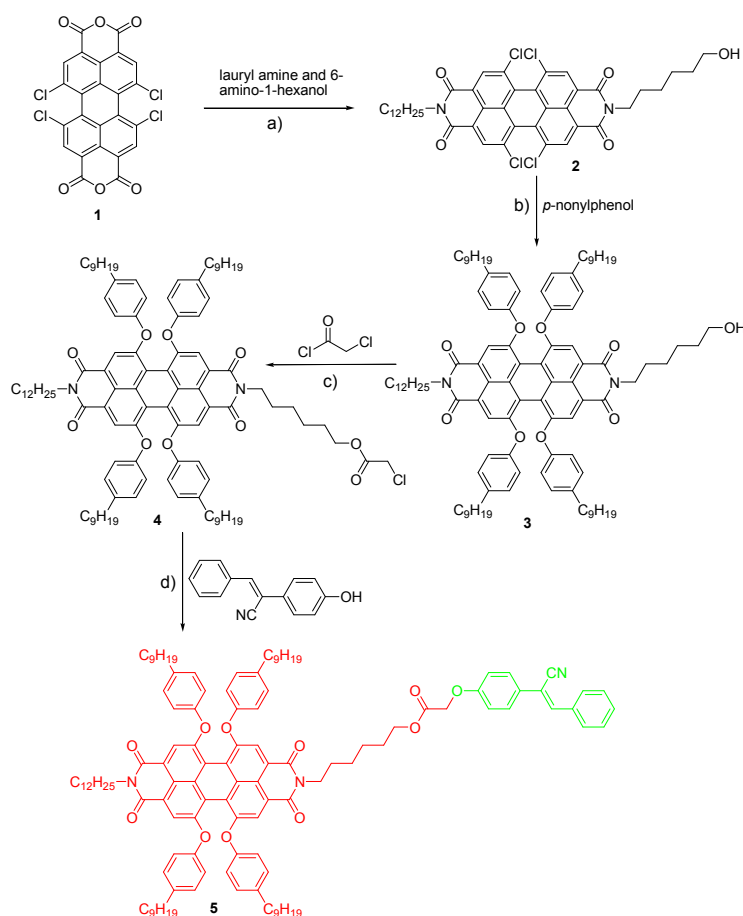

**Scheme 1** Synthetic route of title compound: a) isopropanol, reflux, 8h, yield: 28%; b) *N*-methyl-2-pyrrolidone (NMP), K<sub>2</sub>CO<sub>3</sub>, 130 °C, overnight, yield: 78%; c) DCM, 35 °C, 6h, yield: 86%; d) anhydrous MeCN, K<sub>2</sub>CO<sub>3</sub>, reflux, overnight, yield: 75%.

## 2. Analytical Data

### 2.1. $^1\text{H}$ NMR and $^{13}\text{C}$ NMR Spectroscopy

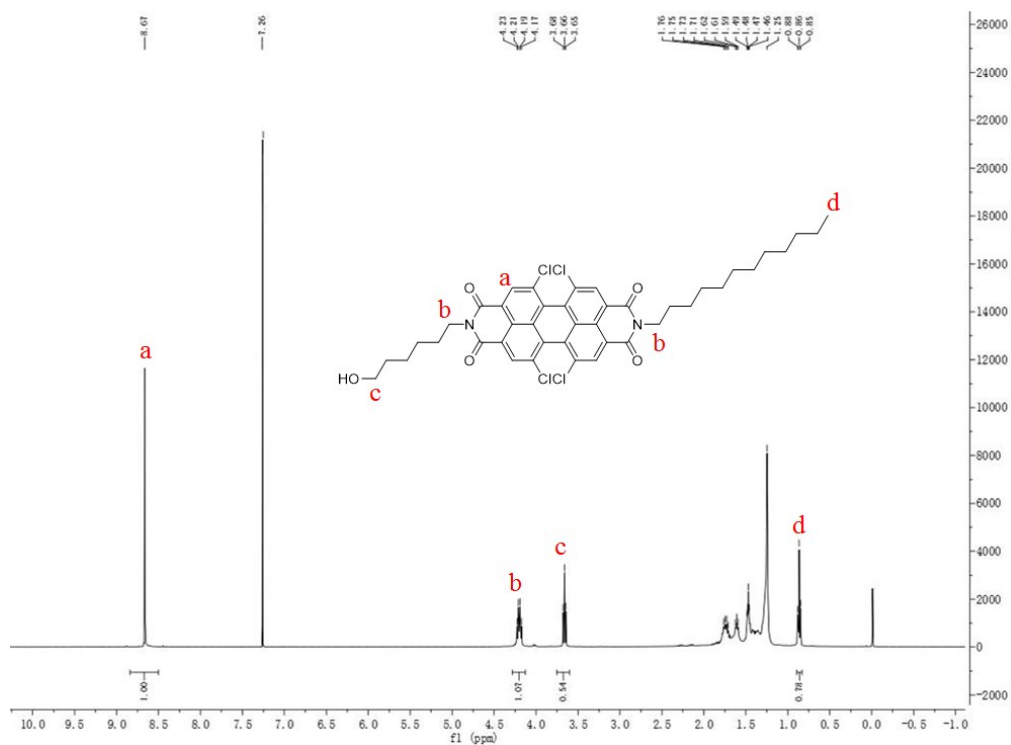

Fig.S1  $^1\text{H}$  NMR spectrum of PBI 2.

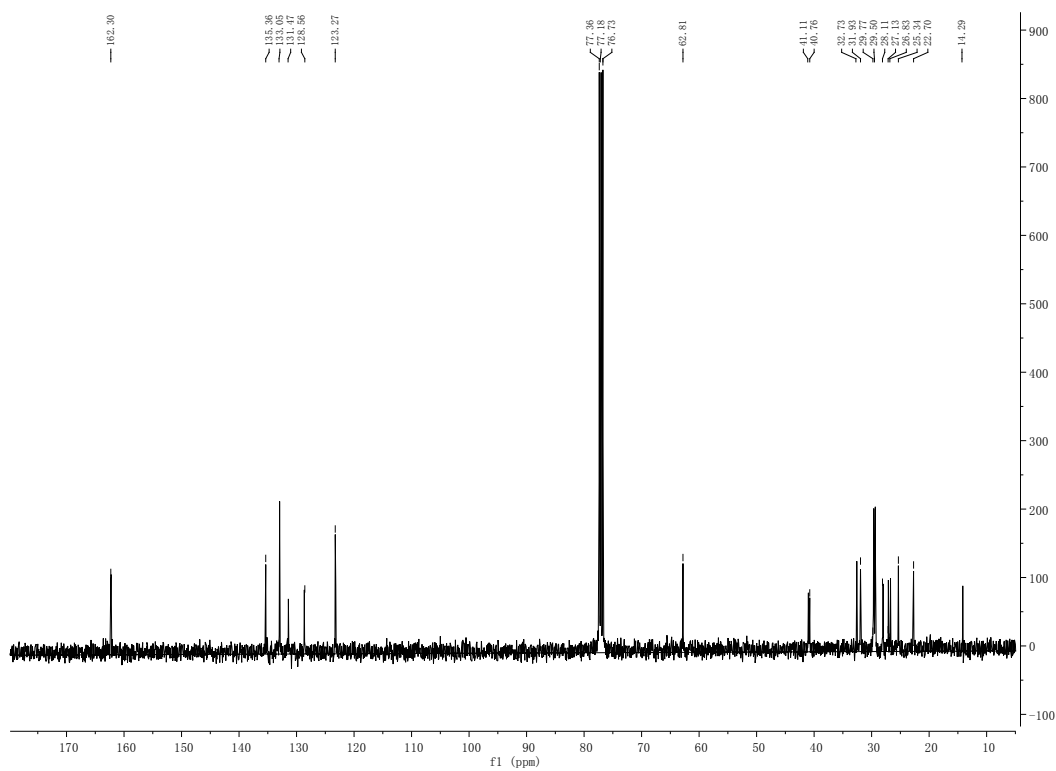

Fig.S2  $^{13}\text{C}$  NMR spectrum of PBI 2.

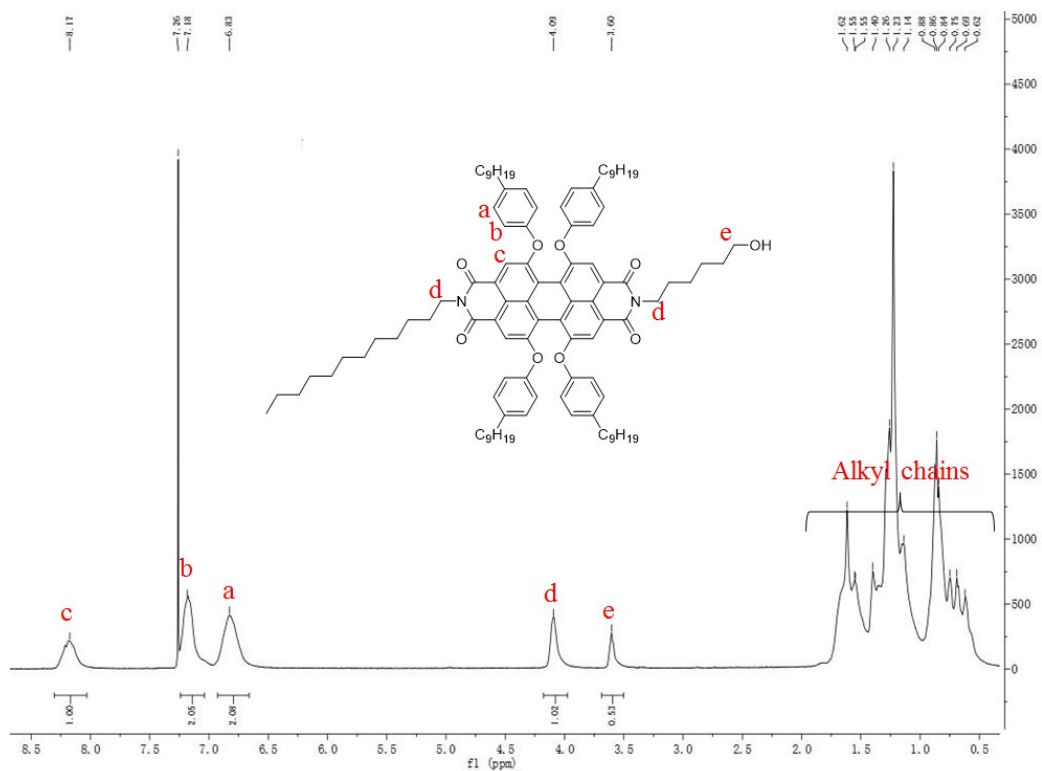

Fig.S3 <sup>1</sup>H NMR spectrum of PBI 3.

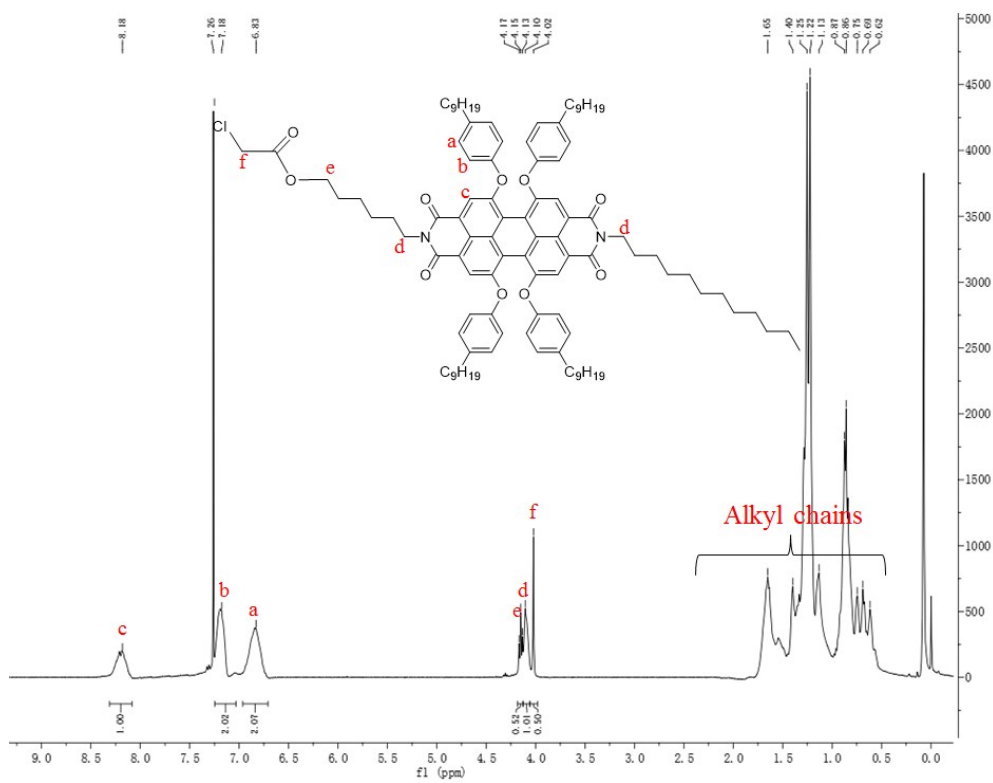

Fig.S4 <sup>1</sup>H NMR spectrum of PBI 4.



## 2.2. MALDI-TOF Mass spectrometry

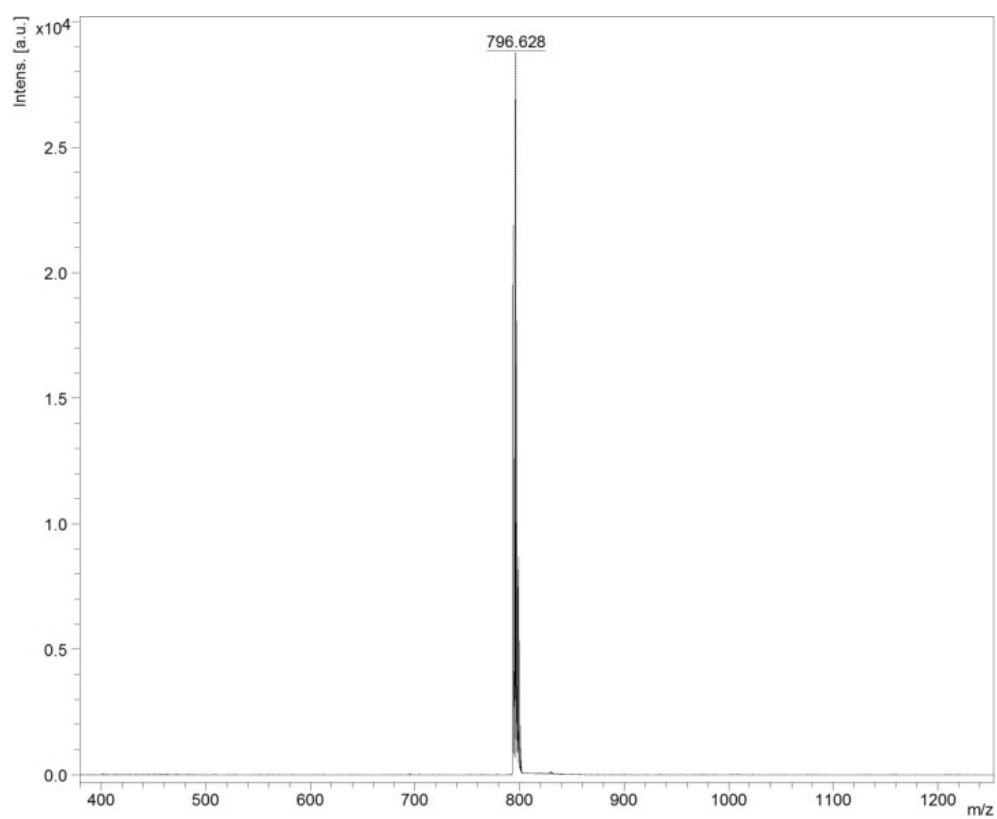

**Fig. S7:** MALDI-TOF mass spectrum of PBI 2.

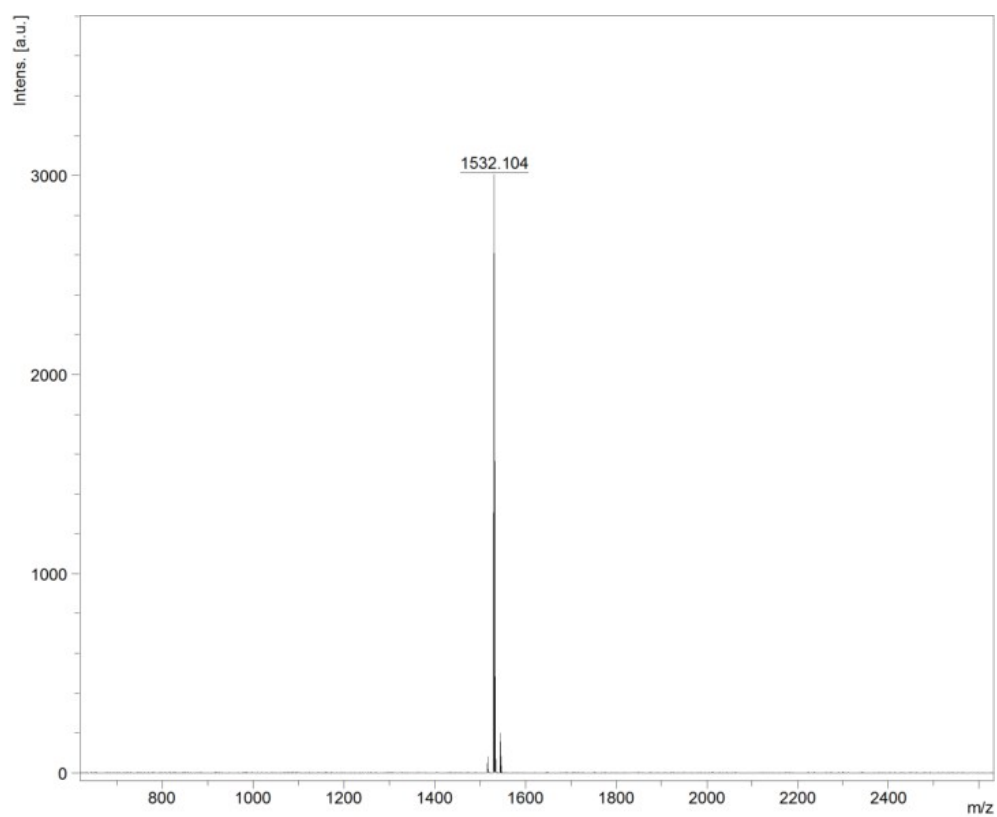

**Fig. S8:** MALDI-TOF mass spectrum of PBI 3.

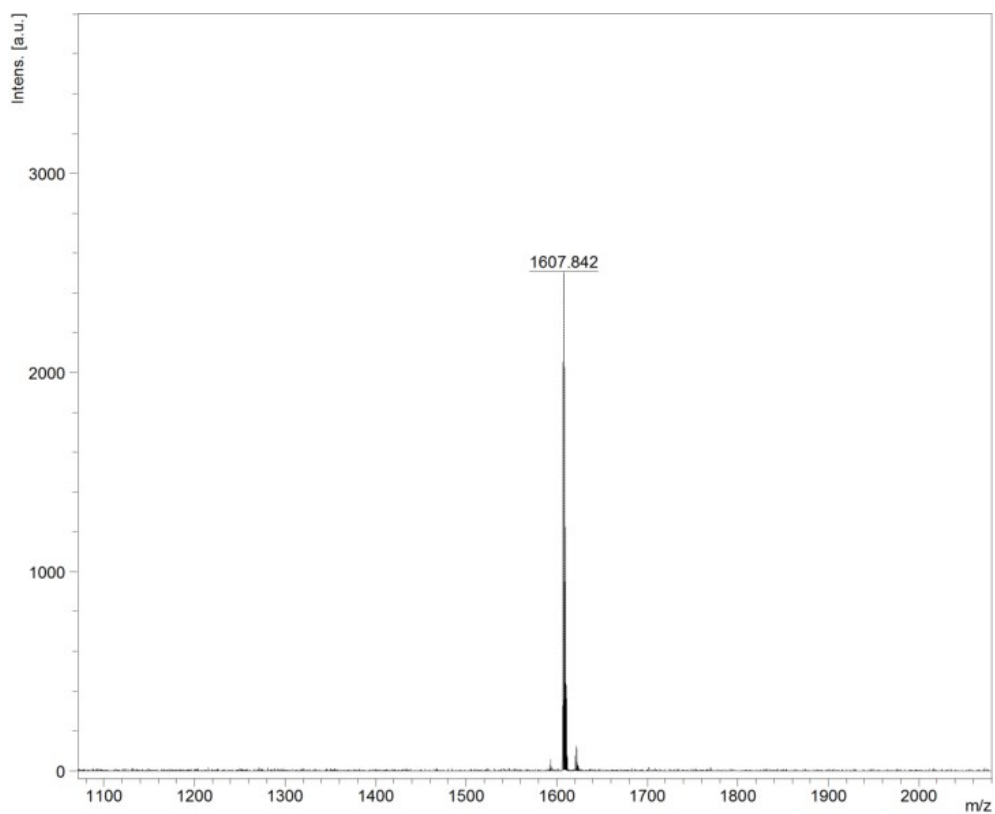

**Fig. S9:** MALDI-TOF mass spectrum of PBI 4.

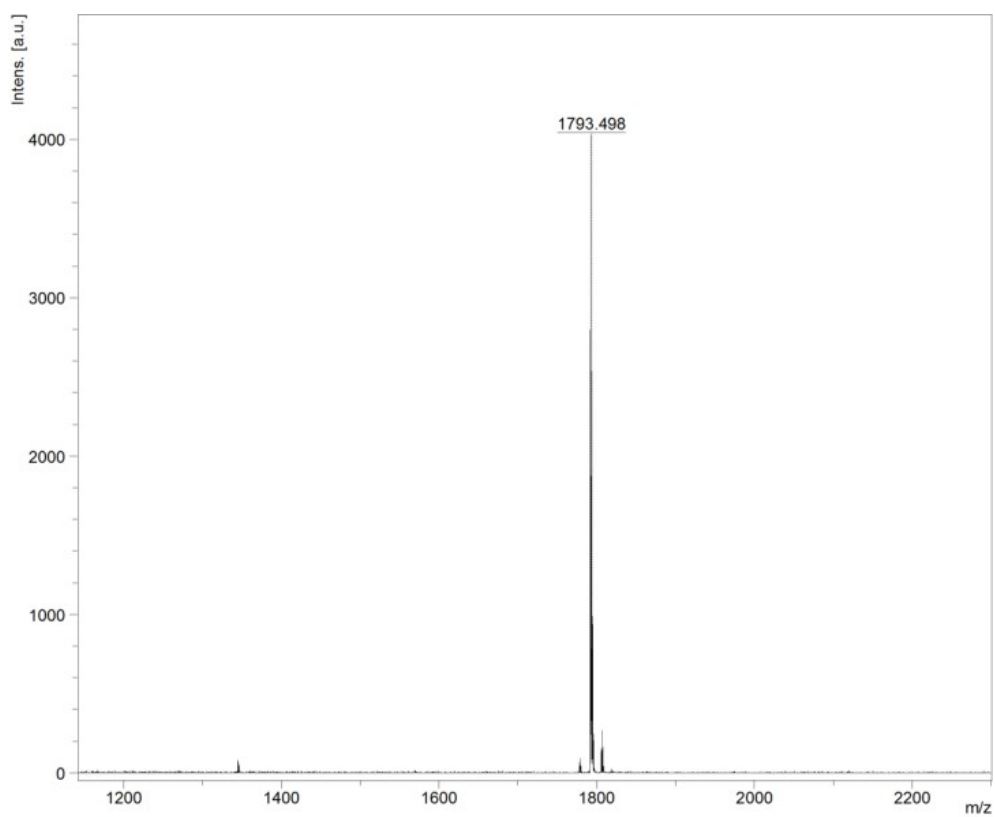

**Fig. S10:** MALDI-TOF mass spectrum of PBI 5.

### 2.3 Photophysical properties

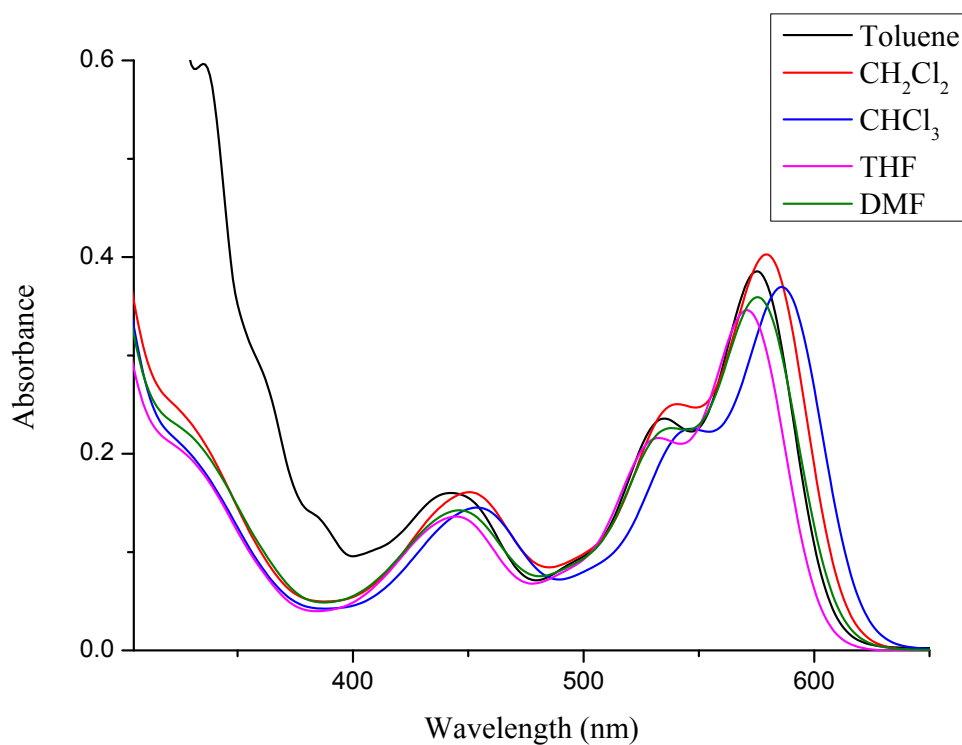

**Fig. S11** The UV-Vis absorption spectra of PBI **5** in different solvents (10  $\mu$ M).

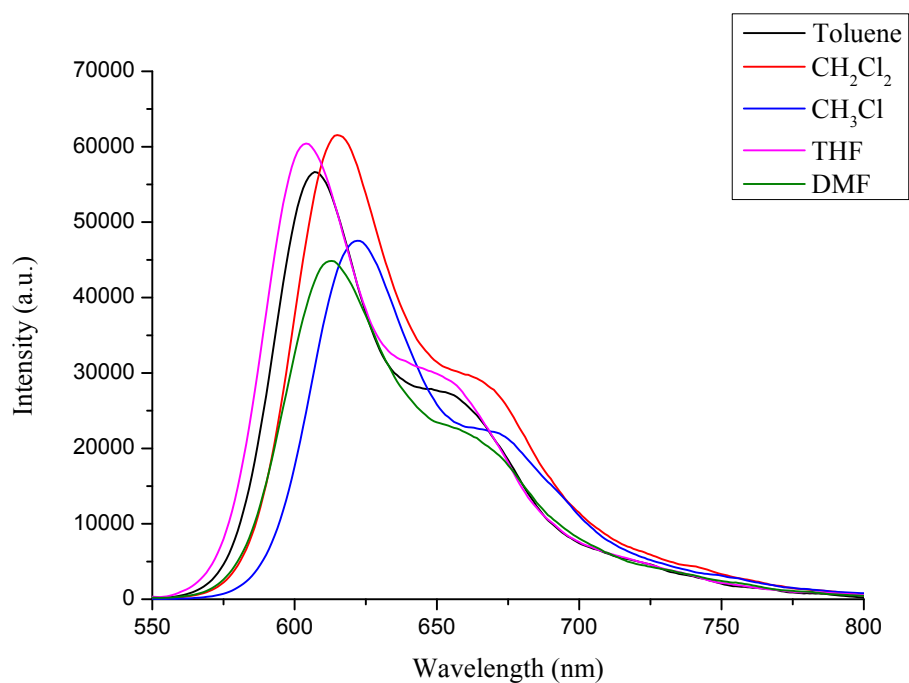

**Fig. S12** Fluorescence emission spectra of PBI **5** in different solvents (10  $\mu$ M,  $\lambda_{\text{ex}}$  = 530 nm).

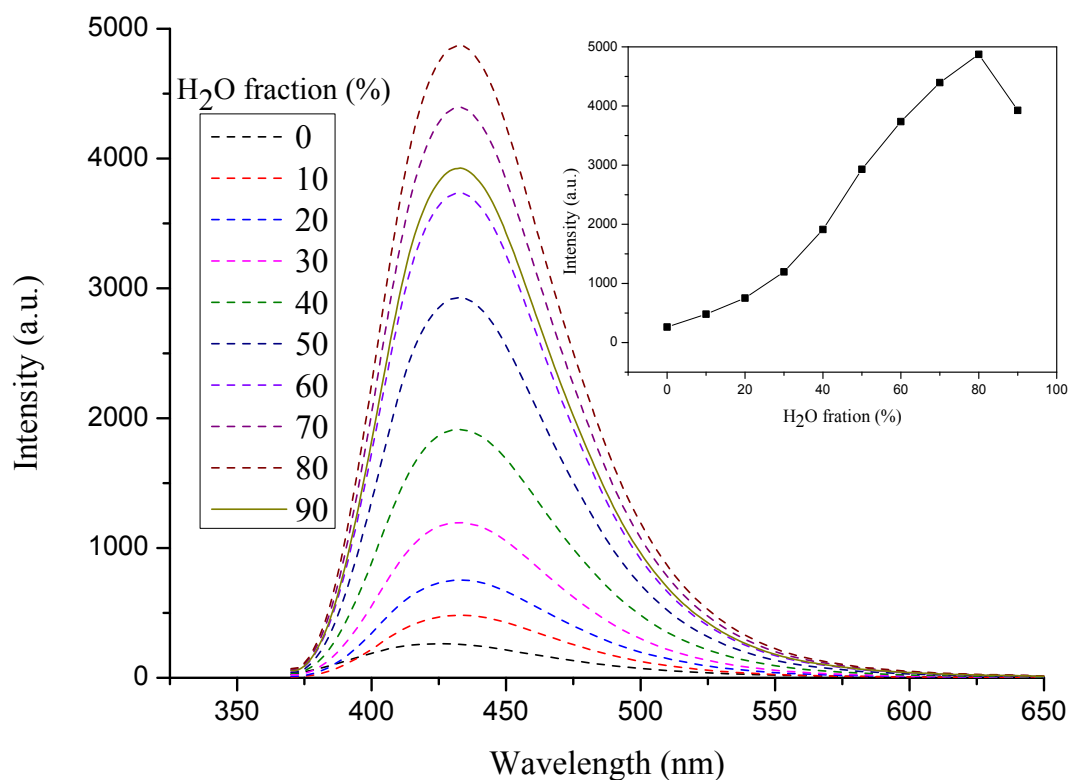

**Fig. S13** Emission spectra of the hydroxyl-diphenylacrylonitrile in THF-water system ( $10 \mu\text{M}$ ) with different water fractions ( $f_w$ ), excited at  $\lambda_{\text{ex}} = 330 \text{ nm}$ . (The inset: Variations in intensity with  $f_w$ ).

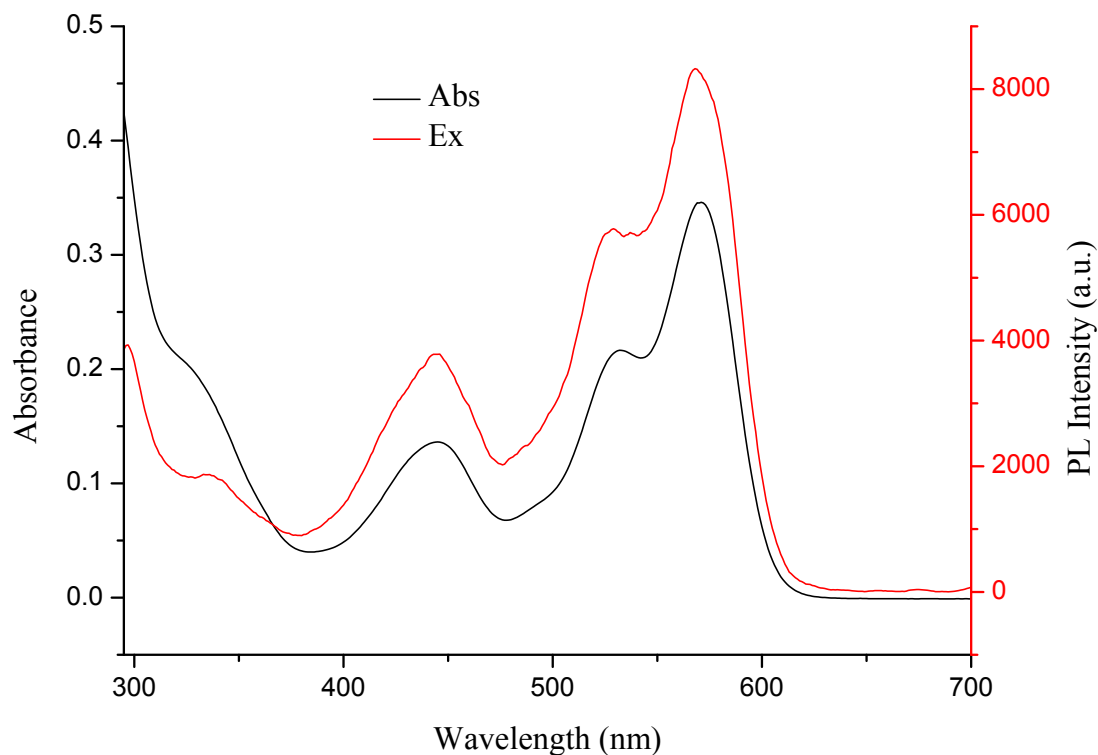

**Fig. S14** The absorption and excitation spectra of PBI 5 in THF solution. ( $10 \mu\text{M}$ ,  $\lambda_{\text{em}} = 604 \text{ nm}$  was used to record the excitation spectrum).



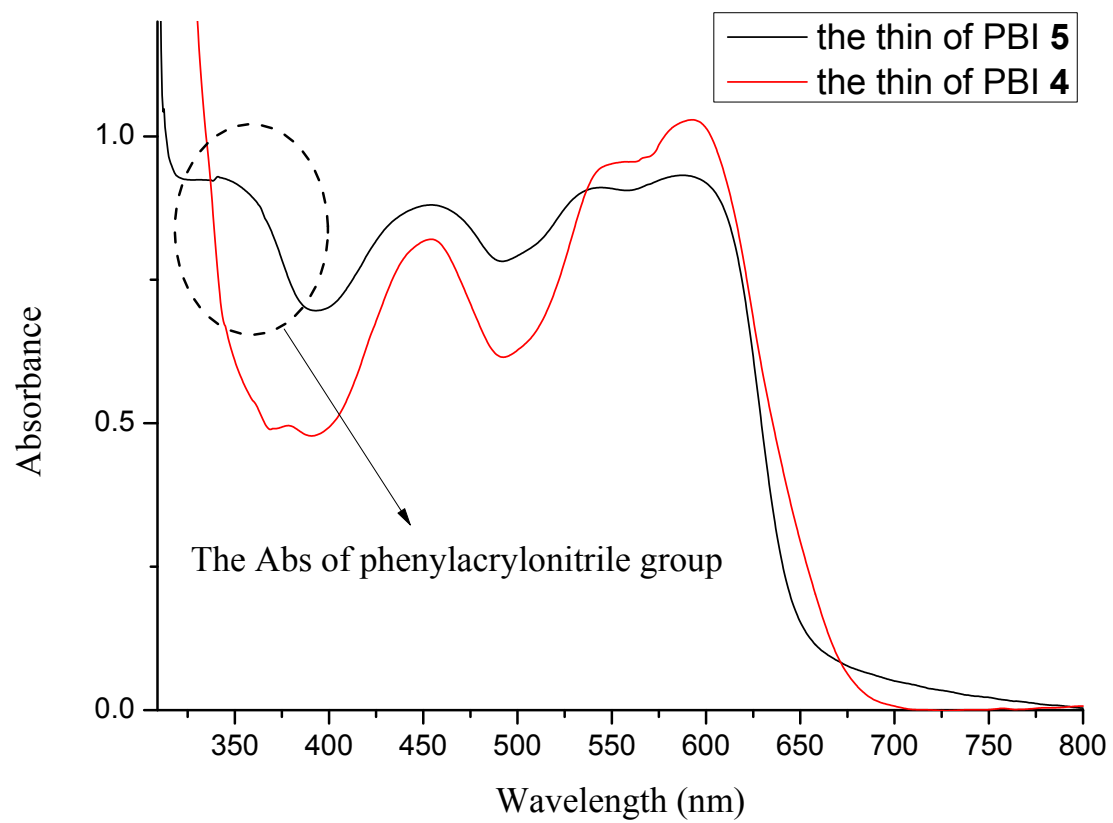

**Fig. S15** The thin film absorption spectra of PBIs 4 and 5.
